# Supplementary material for: Interactions of oxaliplatin with the cytoplasmic thiol containing ligand glutathione
Source: Royal Society of Chemistry journal article supplement (doi:10.1039/c2mt20127e), 2012-01-01
Supplement: c2mt20127e_2.pdf [file c2mt20127e_2.pdf]

Table S1: Electronic energies, Zero-Point Vibrational Energies, Thermal Energies, Entropies and relative free energies for species calculated at B3LYP\LANL2DZ. Italicized values are for PCM calculations in a water solvent.

| Structure | Electronic energy (Hartrees) | ZPE (kcal mol <sup>-1</sup> ) | H <sub>298</sub> <sup>0</sup> - H <sub>0</sub> <sup>0</sup> (kcal mol <sup>-1</sup> ) | Entropy (cal mol <sup>-1</sup> K <sup>-1</sup> ) | Relative free energy at 298 K (kcal mol <sup>-1</sup> ) |
|-----------|------------------------------|-------------------------------|---------------------------------------------------------------------------------------|--------------------------------------------------|---------------------------------------------------------|
| 1         | -1017.30979571               | 191.0                         | 14.4                                                                                  | 168.2                                            | 0.0                                                     |
| 2A        | -843.220209398               | 157.3                         | 9.7                                                                                   | 122.4                                            | 0.0                                                     |
| 2B        | -843.212536339               | 157.0                         | 9.8                                                                                   | 123.3                                            | 4.3                                                     |
| 3A        | -1860.21631009               | 344.3                         | 24.2                                                                                  | 239.8                                            | 0.0                                                     |
|           | <i>-1860.31719602</i>        | <i>344.2</i>                  | <i>24.4</i>                                                                           | <i>239.6</i>                                     | <i>4.8</i>                                              |
| 3B        | -1860.19873053               | 341.6                         | 24.6                                                                                  | 251.4                                            | 3.4                                                     |
|           | <i>-1860.31720783</i>        | <i>341.6</i>                  | <i>24.5</i>                                                                           | <i>247.3</i>                                     | <i>0.0</i>                                              |
| 3C        | -1860.19208781               | 341.8                         | 24.4                                                                                  | 241.1                                            | 10.8                                                    |
|           | <i>-1860.29578354</i>        | <i>341.6</i>                  | <i>24.5</i>                                                                           | <i>242.5</i>                                     | <i>14.9</i>                                             |
| 3D        | -1860.18236357               | 339.6                         | 24.5                                                                                  | 249.9                                            | 12.1                                                    |
|           | <i>-1860.29472864</i>        | <i>338.3</i>                  | <i>24.0</i>                                                                           | <i>242.0</i>                                     | <i>11.8</i>                                             |
| 3E        | -1860.17516672               | 341.3                         | 24.3                                                                                  | 241.8                                            | 20.6                                                    |
|           | <i>-1860.28409844</i>        | <i>341.0</i>                  | <i>24.4</i>                                                                           | <i>241.4</i>                                     | <i>21.9</i>                                             |
| 4A        | -1481.92276603               | 313.5                         | 19.6                                                                                  | 197.2                                            | 0.0                                                     |
|           | <i>-1482.01472460</i>        | <i>313.6</i>                  | <i>19.6</i>                                                                           | <i>197.7</i>                                     | <i>1.7</i>                                              |
| 4B        | -1481.91962971               | 313.7                         | 19.5                                                                                  | 199.2                                            | 1.4                                                     |
|           | <i>-1482.01650165</i>        | <i>314.0</i>                  | <i>19.7</i>                                                                           | <i>201.0</i>                                     | <i>0.0</i>                                              |
| 4C        | -1481.91362745               | 312.5                         | 20.1                                                                                  | 205.5                                            | 2.8                                                     |
|           | <i>-1482.00320286</i>        | <i>312.9</i>                  | <i>20.1</i>                                                                           | <i>204.2</i>                                     | <i>6.7</i>                                              |
| 4D        | -1481.91157780               | 312.7                         | 19.9                                                                                  | 204.7                                            | 4.3                                                     |
|           | <i>-1481.99859236</i>        | <i>312.4</i>                  | <i>20.0</i>                                                                           | <i>204.8</i>                                     | <i>8.9</i>                                              |
| 4E        | -1481.90373487               | 311.8                         | 19.7                                                                                  | 197.4                                            | 10.3                                                    |
|           | <i>-1481.99887712</i>        | <i>312.0</i>                  | <i>19.9</i>                                                                           | <i>200.8</i>                                     | <i>9.4</i>                                              |
| 4F        | -1481.90264578               | 311.6                         | 19.7                                                                                  | 198.8                                            | 10.4                                                    |
|           | <i>-1481.99827363</i>        | <i>311.9</i>                  | <i>19.9</i>                                                                           | <i>202.7</i>                                     | <i>9.1</i>                                              |
| 4G        | -1481.88932684               | 310.7                         | 20.2                                                                                  | 209.1                                            | 15.3                                                    |
|           | <i>-1482.00337269</i>        | <i>311.5</i>                  | <i>20.1</i>                                                                           | <i>206.2</i>                                     | <i>4.7</i>                                              |
| 4H        | -1481.88845751               | 311.9                         | 19.6                                                                                  | 195.2                                            | 20.5                                                    |
|           | <i>-1481.98119466</i>        | <i>311.7</i>                  | <i>19.9</i>                                                                           | <i>201.2</i>                                     | <i>20.1</i>                                             |
| 4I        | -1481.88495103               | 311.2                         | 19.7                                                                                  | 197.6                                            | 21.4                                                    |
|           | <i>-1481.99738203</i>        | <i>312.3</i>                  | <i>19.8</i>                                                                           | <i>200.3</i>                                     | <i>10.6</i>                                             |
| 4J        | -1481.88370360               | 310.3                         | 19.5                                                                                  | 194.0                                            | 22.2                                                    |
|           | <i>-1481.98124598</i>        | <i>311.4</i>                  | <i>19.8</i>                                                                           | <i>197.5</i>                                     | <i>20.7</i>                                             |
| 4K        | -1481.86227783               | 310.5                         | 19.7                                                                                  | 197.9                                            | 34.8                                                    |
|           | <i>-1481.97398714</i>        | <i>311.1</i>                  | <i>20.1</i>                                                                           | <i>204.0</i>                                     | <i>23.3</i>                                             |
| 4L        | -1481.85401975               | 310.2                         | 20.0                                                                                  | 207.0                                            | 37.3                                                    |
|           | <i>-1481.98182343</i>        | <i>311.2</i>                  | <i>20.0</i>                                                                           | <i>206.9</i>                                     | <i>17.5</i>                                             |
| 4N        | -1481.84125844               | 309.6                         | 20.3                                                                                  | 205.1                                            | 45.6                                                    |
|           | <i>-1481.94061505</i>        | <i>310.2</i>                  | <i>20.4</i>                                                                           | <i>207.0</i>                                     | <i>42.8</i>                                             |
| 5A        | -1405.45626421               | 297.1                         | 18.1                                                                                  | 187.8                                            | 0.0                                                     |
| 5B        | -1405.43725726               | 296.2                         | 18.3                                                                                  | 184.8                                            | 12.1                                                    |
| 5C        | -1405.43503283               | 297.0                         | 17.9                                                                                  | 178.6                                            | 15.8                                                    |
| 5D        | -1405.41026591               | 294.3                         | 18.9                                                                                  | 191.8                                            | 25.8                                                    |
| 5E        | -1405.41533057               | 296.4                         | 18.1                                                                                  | 185.2                                            | 25.9                                                    |

|    |                       |              |             |              |             |
|----|-----------------------|--------------|-------------|--------------|-------------|
| 5F | -1405.40223282        | 294.3        | 18.9        | 194.6        | 30.3        |
| 5G | -1405.37892680        | 291.8        | 19.2        | 199.8        | 40.8        |
| 5H | -1405.33608263        | 293.2        | 18.9        | 190.6        | 71.6        |
| 6A | -1482.20748846        | 319.3        | 20.0        | 201.4        | 0.0         |
|    | <i>-1482.43954619</i> | <i>319.3</i> | <i>20.3</i> | <i>207.3</i> | <i>0.0</i>  |
| 6B | -1482.19970614        | 319.1        | 19.7        | 207.9        | 2.9         |
|    | <i>-1482.43481313</i> | <i>319.2</i> | <i>20.4</i> | <i>210.0</i> | <i>2.2</i>  |
| 6C | -1482.20178959        | 319.1        | 20.1        | 202.1        | 3.2         |
|    | <i>-1482.43488502</i> | <i>319.0</i> | <i>20.6</i> | <i>211.6</i> | <i>1.1</i>  |
| 6D | -1482.19436532        | 318.7        | 20.1        | 208.9        | 5.5         |
|    | <i>-1482.42978637</i> | <i>318.9</i> | <i>20.4</i> | <i>211.8</i> | <i>4.5</i>  |
| 6E | -1482.18833789        | 318.6        | 20.0        | 203.0        | 10.9        |
|    | <i>-1482.41055137</i> | <i>318.4</i> | <i>20.3</i> | <i>207.1</i> | <i>17.3</i> |
| 6F | -1482.18325841        | 319.5        | 19.4        | 194.2        | 16.9        |
|    | <i>-1482.41599857</i> | <i>319.5</i> | <i>19.4</i> | <i>194.2</i> | <i>18.0</i> |
| 6G | -1482.16929415        | 318.1        | 20.2        | 207.7        | 21.1        |
|    | <i>-1482.40995059</i> | <i>318.5</i> | <i>20.1</i> | <i>205.9</i> | <i>18.0</i> |
| 6H | -1482.16845499        | 318.6        | 20.2        | 206.1        | 22.6        |
|    | <i>-1482.39802650</i> | <i>318.6</i> | <i>20.4</i> | <i>210.1</i> | <i>24.5</i> |
| 6I | -1482.16944570        | 318.9        | 20.1        | 202.3        | 23.2        |
|    | <i>-1482.41853495</i> | <i>319.4</i> | <i>20.2</i> | <i>205.5</i> | <i>13.7</i> |
| 6J | -1482.16658286        | 318.4        | 20.1        | 204.0        | 24.1        |
|    | <i>-1482.42055646</i> | <i>319.4</i> | <i>20.2</i> | <i>204.8</i> | <i>12.6</i> |
| 6K | -1482.15311196        | 318.1        | 20.3        | 208.1        | 31.2        |
|    | <i>-1482.41699042</i> | <i>319.5</i> | <i>20.2</i> | <i>206.0</i> | <i>14.6</i> |
| 6L | -1482.14990027        | 318.3        | 20.1        | 202.9        | 34.7        |
|    | <i>-1482.40688415</i> | <i>318.7</i> | <i>20.2</i> | <i>209.2</i> | <i>19.2</i> |
| 6M | -1482.14780035        | 319.0        | 20.0        | 203.7        | 36.4        |
|    | <i>-1482.41510264</i> | <i>320.2</i> | <i>20.0</i> | <i>205.0</i> | <i>16.6</i> |
| 6N | -1482.14610111        | 318.0        | 20.3        | 202.8        | 37.0        |
|    | -----                 | -----        | ----        | -----        | ----        |
| 6O | -1482.14687311        | 320.3        | 20.0        | 201.3        | 39.0        |
|    | <i>-1482.38078503</i> | <i>320.2</i> | <i>20.0</i> | <i>202.2</i> | <i>35.9</i> |
